# Supplementary material
Source: HighWire-hosted journal article supplement (https://bmjopenquality.bmj.com/highwire/filestream/136246/field_highwire_adjunct_files/0/ds4682.pdf)

## Appendix 1 Run Charts

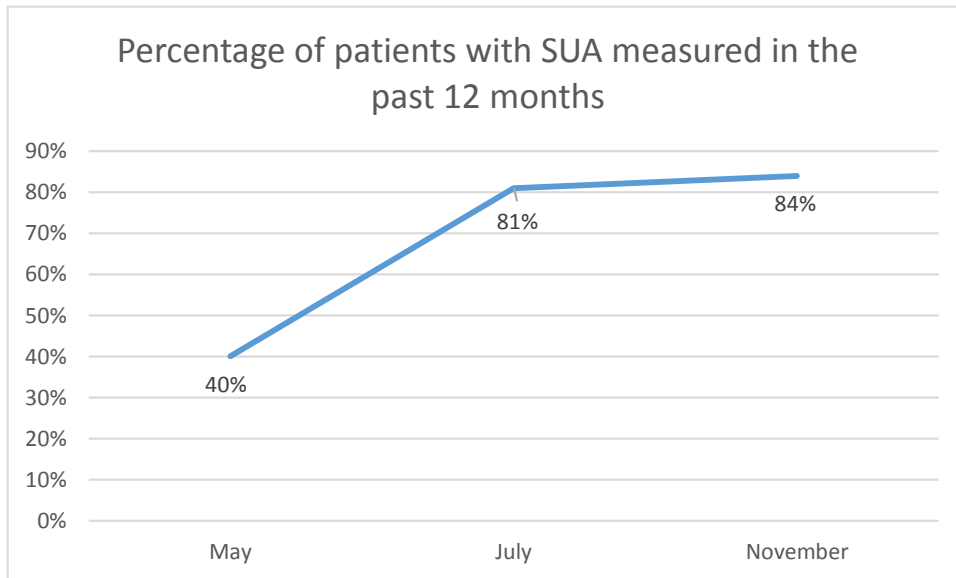

Figure 1

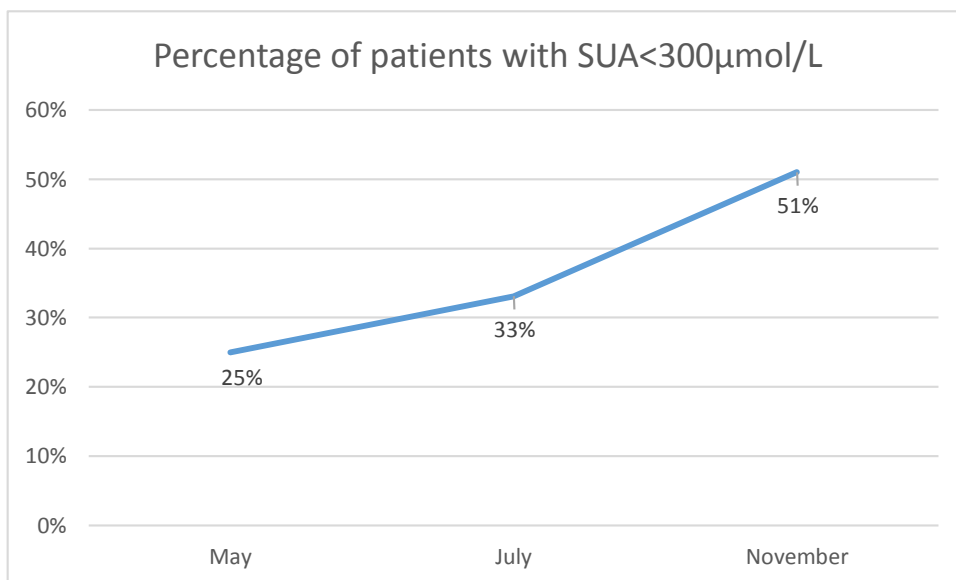

Figure 2

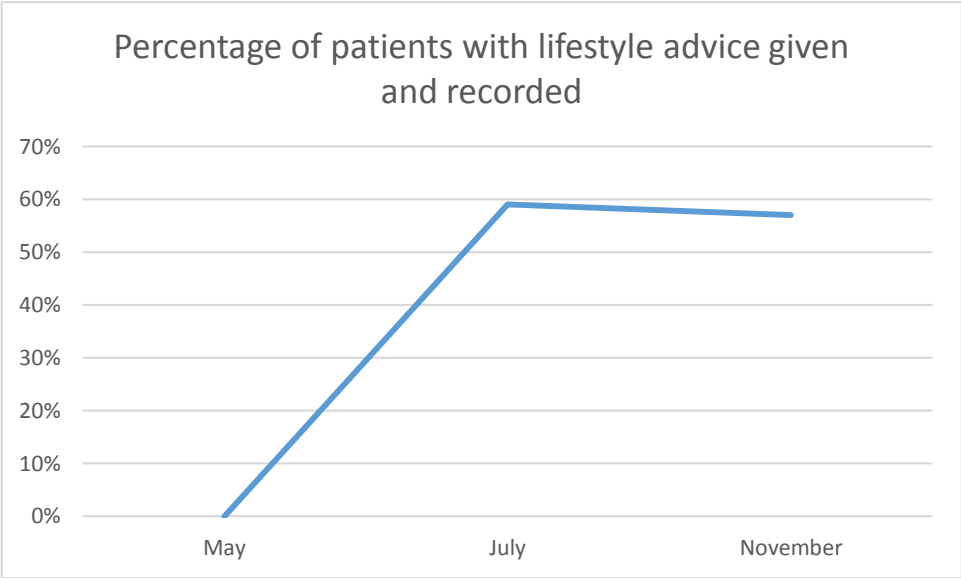

Figure 3

Supplement: ds4682.pdf [file ds4682.pdf]
